# Supplementary material for: Ultrafast resistive-type γ-Fe2O3–rGO nanohybrid-based humidity sensor – a respiratory monitoring tool
Source: Royal Society of Chemistry journal article supplement (doi:10.1039/d1tc01217g), 2021-01-01
Supplement: d1tc01217g1.pdf [file d1tc01217g1.pdf]

# Electronic Supplementary Information

Ultrafast resistive type  $\gamma$ -Fe<sub>2</sub>O<sub>3</sub>-rGO nanohybrids based humidity sensor – a  
respiratory monitoring tool

Atul Kumar<sup>a</sup>, Anil Kumar<sup>\*a,b</sup>, G.D Varma<sup>\*a,c</sup>

*<sup>a</sup>Centre of Excellence-Nanotechnology, Indian Institute of Technology Roorkee,  
Roorkee-247667, India.*

*<sup>b</sup>Department of Chemistry, Indian Institute of Technology Roorkee, Roorkee-  
247667, India.*

*<sup>c</sup>Department of Physics, Indian Institute of Technology Roorkee, Roorkee-  
247667, India.*

This pdf contains:

Figure S1-S10

Table S1

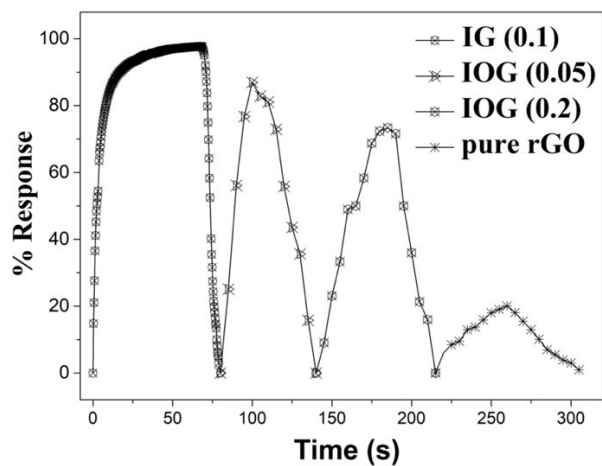

**Fig. S1.** The % response versus time plot against 5 to 95% RH for all fabricated sensors.

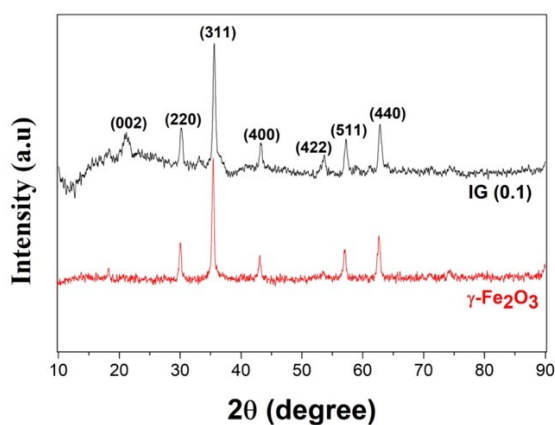

**Fig. S2.** XRD patterns of IG (0.1), and un-doped  $\gamma\text{-Fe}_2\text{O}_3$ .

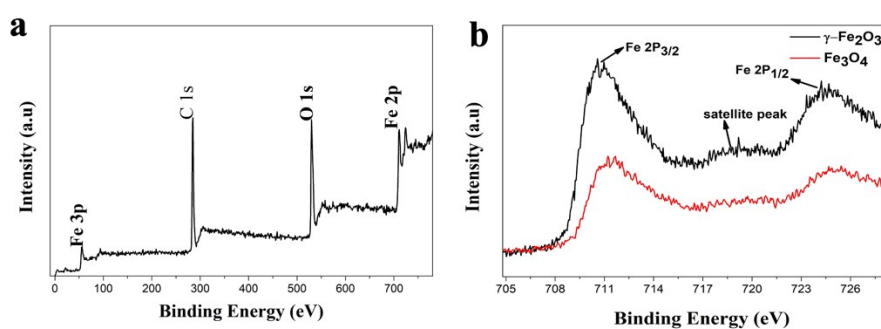

**Fig. S3.** (a) Wide scan XPS spectra of IG (0.1) nanohybrid sensor. (b) Comparison of Fe 2p peak in  $\gamma\text{-Fe}_2\text{O}_3$  and  $\text{Fe}_3\text{O}_4$ .

**Table S1.** Fitting results of O 1s XPS spectra of un-doped  $\gamma$ -Fe<sub>2</sub>O<sub>3</sub> and IG (0.1) nanohybrids.

| Materials                                     | Oxygen species               | Binding energy (eV) | Relative percentage (%) |
|-----------------------------------------------|------------------------------|---------------------|-------------------------|
| Bare $\gamma$ -Fe <sub>2</sub> O <sub>3</sub> | O <sub>L</sub>               | 529.69              | 55.59                   |
|                                               | O <sub>V</sub> (vacancy)     | 531.40              | 40.41                   |
|                                               | O <sub>C</sub> (chemisorbed) | 533.59              | 3.99                    |
| IG (0.1)                                      | O <sub>L</sub>               | 529.66              | 30.241                  |
|                                               | O <sub>V</sub> (vacancy)     | 530.93              | 63.87                   |
|                                               | O <sub>C</sub> (chemisorbed) | 533.11              | 5.99                    |

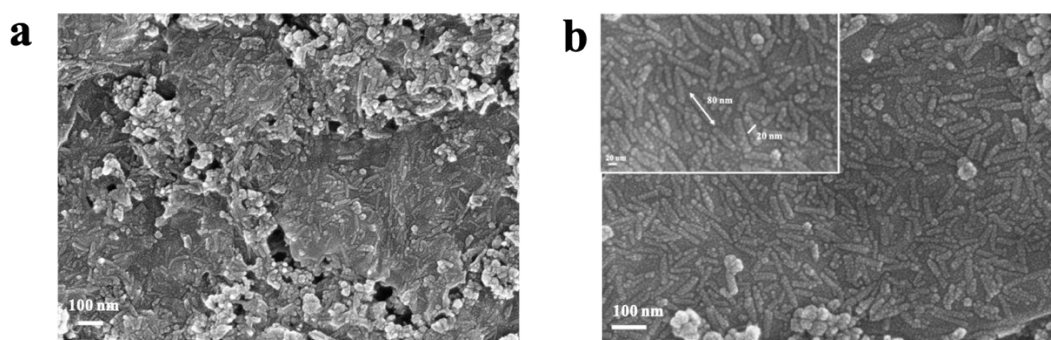

**Fig. S4.** (a-b) FESEM images of IG (0.1) nanohybrids.

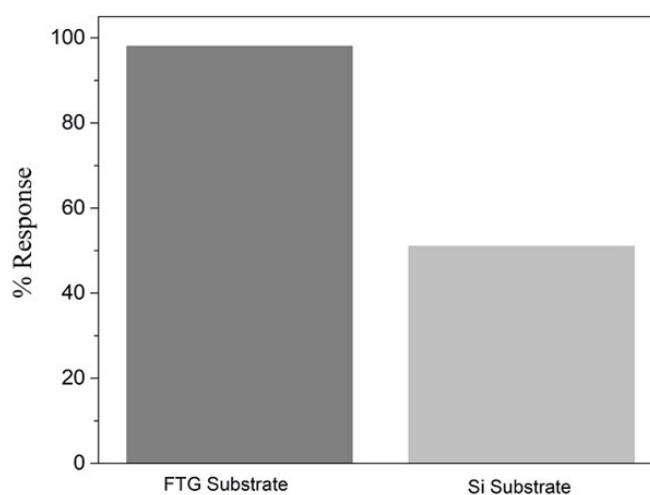

**Fig. S5.** Comparison of %response in case of FTG and silicon (Si) substrate.

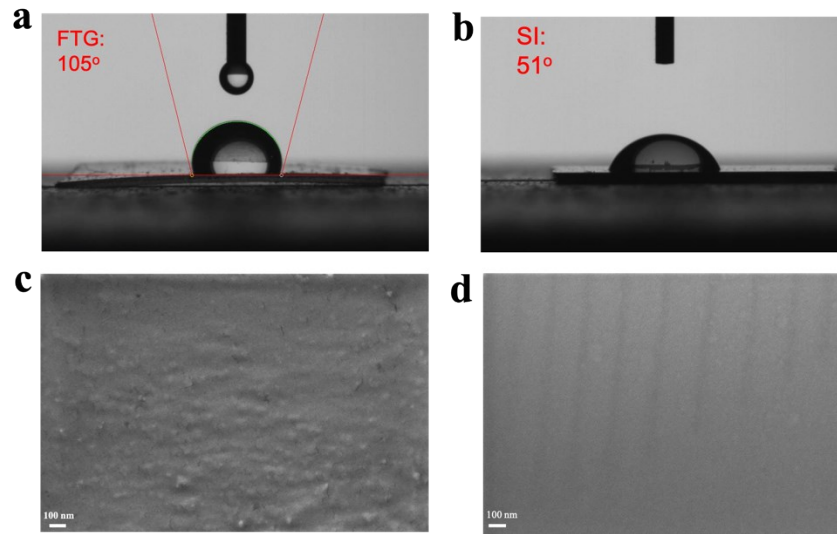

**Fig. S6.** (a, b) Photograph showing that the measured contact angle of a water droplet on the FTG and SI substrate is 105° and 51°. (c, d) FE-SEM image of FTG and SI substrate.

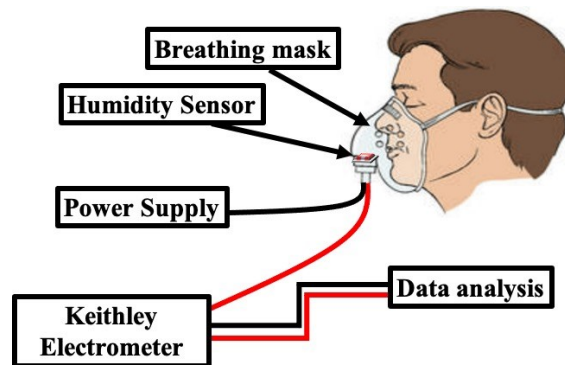

**Fig. S7.** Set up for mastering different respiration rates and other activities.

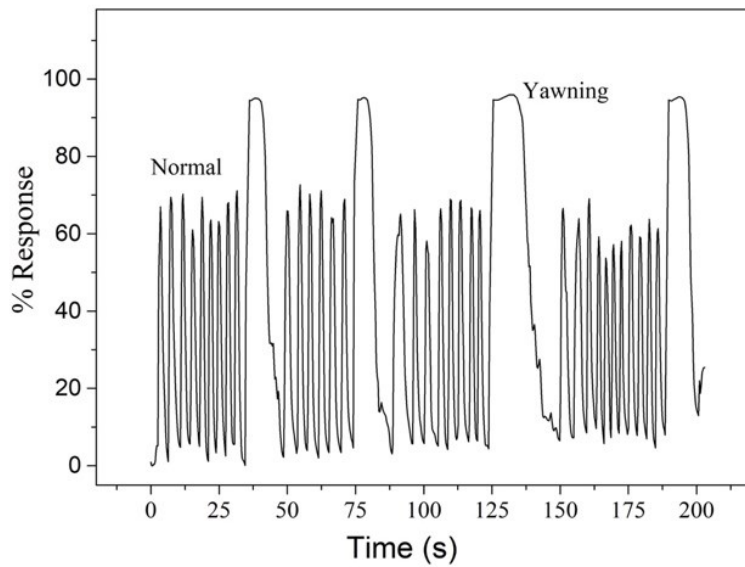

**Fig. S8.** The normal breathing response and yawning response.

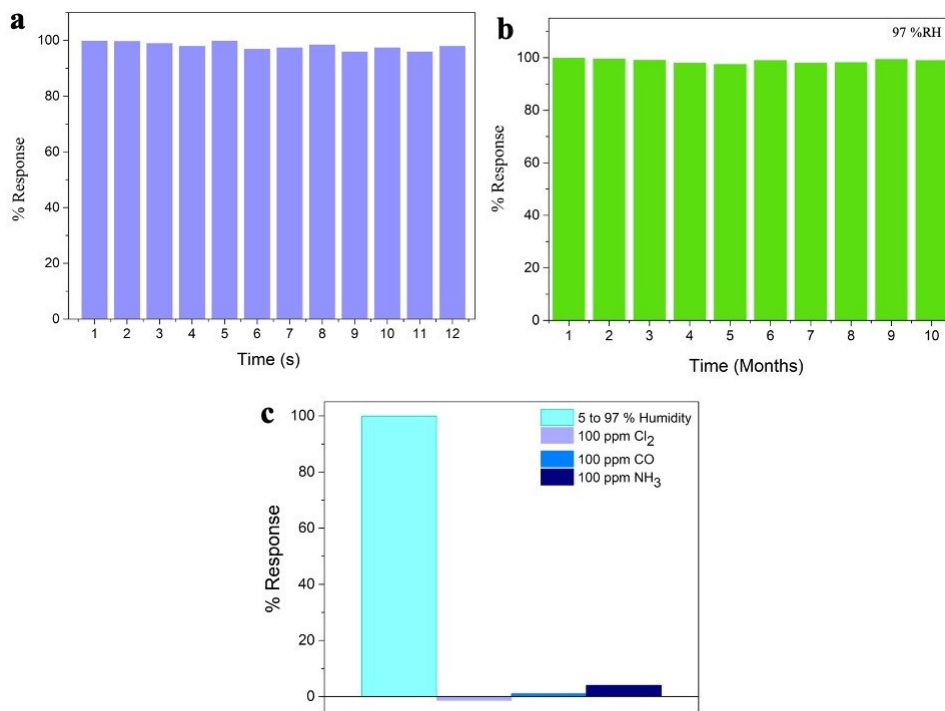

**Fig. S9.** (a, b) The plot of repeatability and stability data. (c) Selectivity of hybrid sensor.

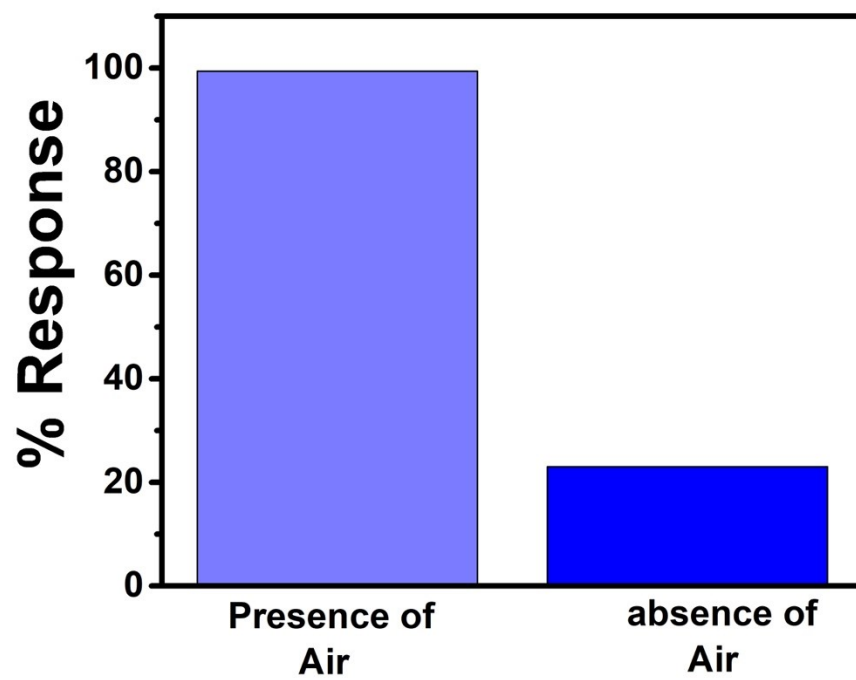

**Fig. S10.** Comparison of % response in case of without N<sub>2</sub> environment and with N<sub>2</sub> environment.
